# Supplementary material for: Microbiome Responses to Fecal Microbiota Transplantation in Cats with Chronic Digestive Issues
Source: Preprints.org preprint supplement (doi:10.20944/preprints202301.0168.v1), 2023-01-10
Supplement: Supplementary file 2 [file supplementary]

## SUPPLEMENTARY FIGURES FOR:

### Microbiome responses to fecal microbiota transplantation in cats with chronic digestive issues

Connie A. Rojas<sup>1,2</sup>, Zhandra Entrolezo<sup>3</sup>, Jessica Jarett<sup>3</sup>, Guillaume Jospin<sup>3</sup>, Dawn Kingsbury<sup>3</sup>, Alex Martin<sup>3</sup>, Jonathan A. Eisen<sup>1,2</sup>, Holly H. Ganz<sup>3</sup>

<sup>1</sup> Genome Center, University of California – Davis, Davis, California, USA

<sup>2</sup> Department of Evolution and Ecology, University of California – Davis, Davis, California, USA

<sup>3</sup> AnimalBiome, Oakland, CA, USA

#### Fig S1. Characteristics of “Responder” and “Non-Responder” FMT recipients.

After treatment, 52/68 FMT recipients experienced a reduction of their clinical signs according to their owners (“Responders”), while 16/68 participants experienced no noticeable change or a worsening of their condition (“Non-Responders”). Below is a breakdown of the percentage of Responder vs. Non-Responders according to their clinical signs, IBD diagnosis, antibiotic use, diet, and sex. Note how the antibiotic usage of one FMT recipient is unknown.

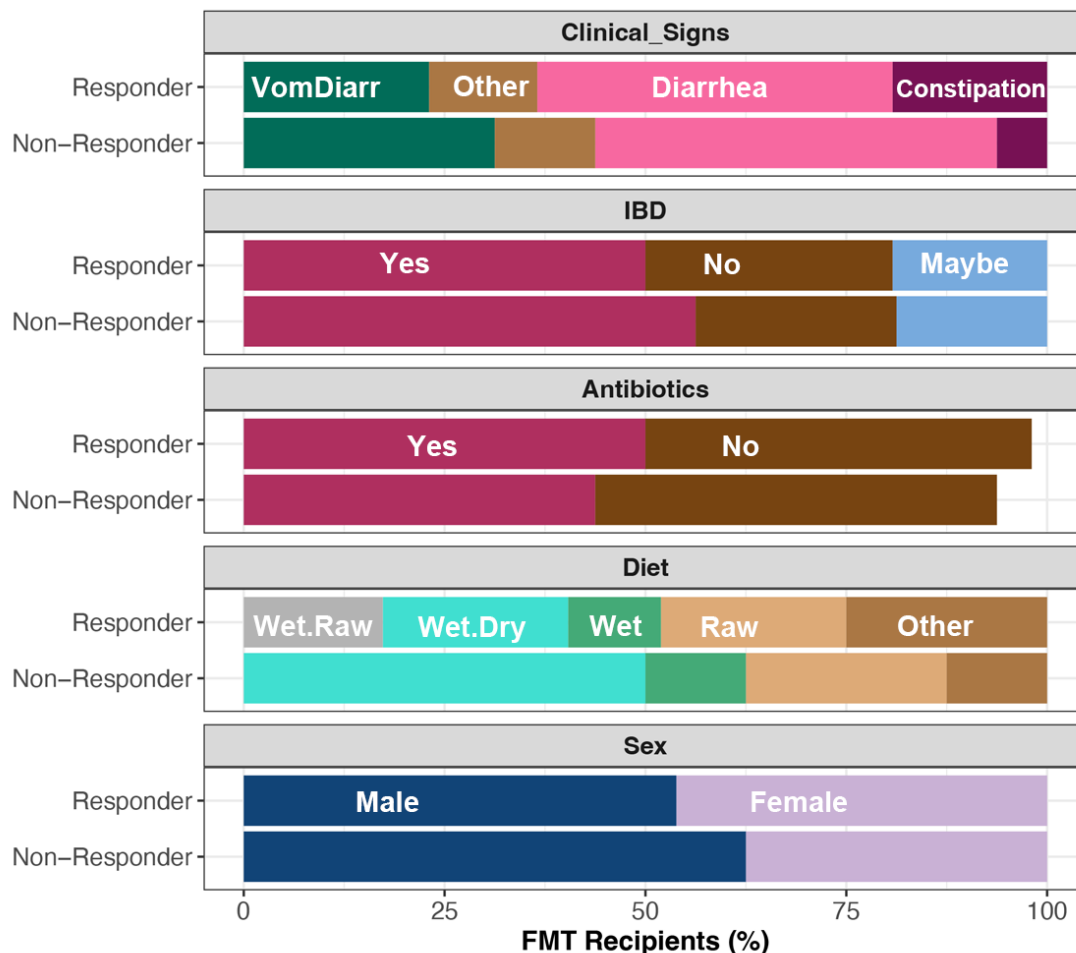

**Fig S2. Fecal microbiomes of recipient animals do not cluster by timepoint (preFMT vs. postFMT).** PCoA ordinations of samples from FMT recipients (N=68) based on Bray-Curtis (top) or Weighted Unifrac distances (bottom). Closeness of points indicates microbiome similarity and points are color-coded by their timepoint (preFMT vs. postFMT). Plots on the right have lines connecting samples that came from the same individual. Statistics of the accompanying PERMANOVA models are in the main manuscript text.

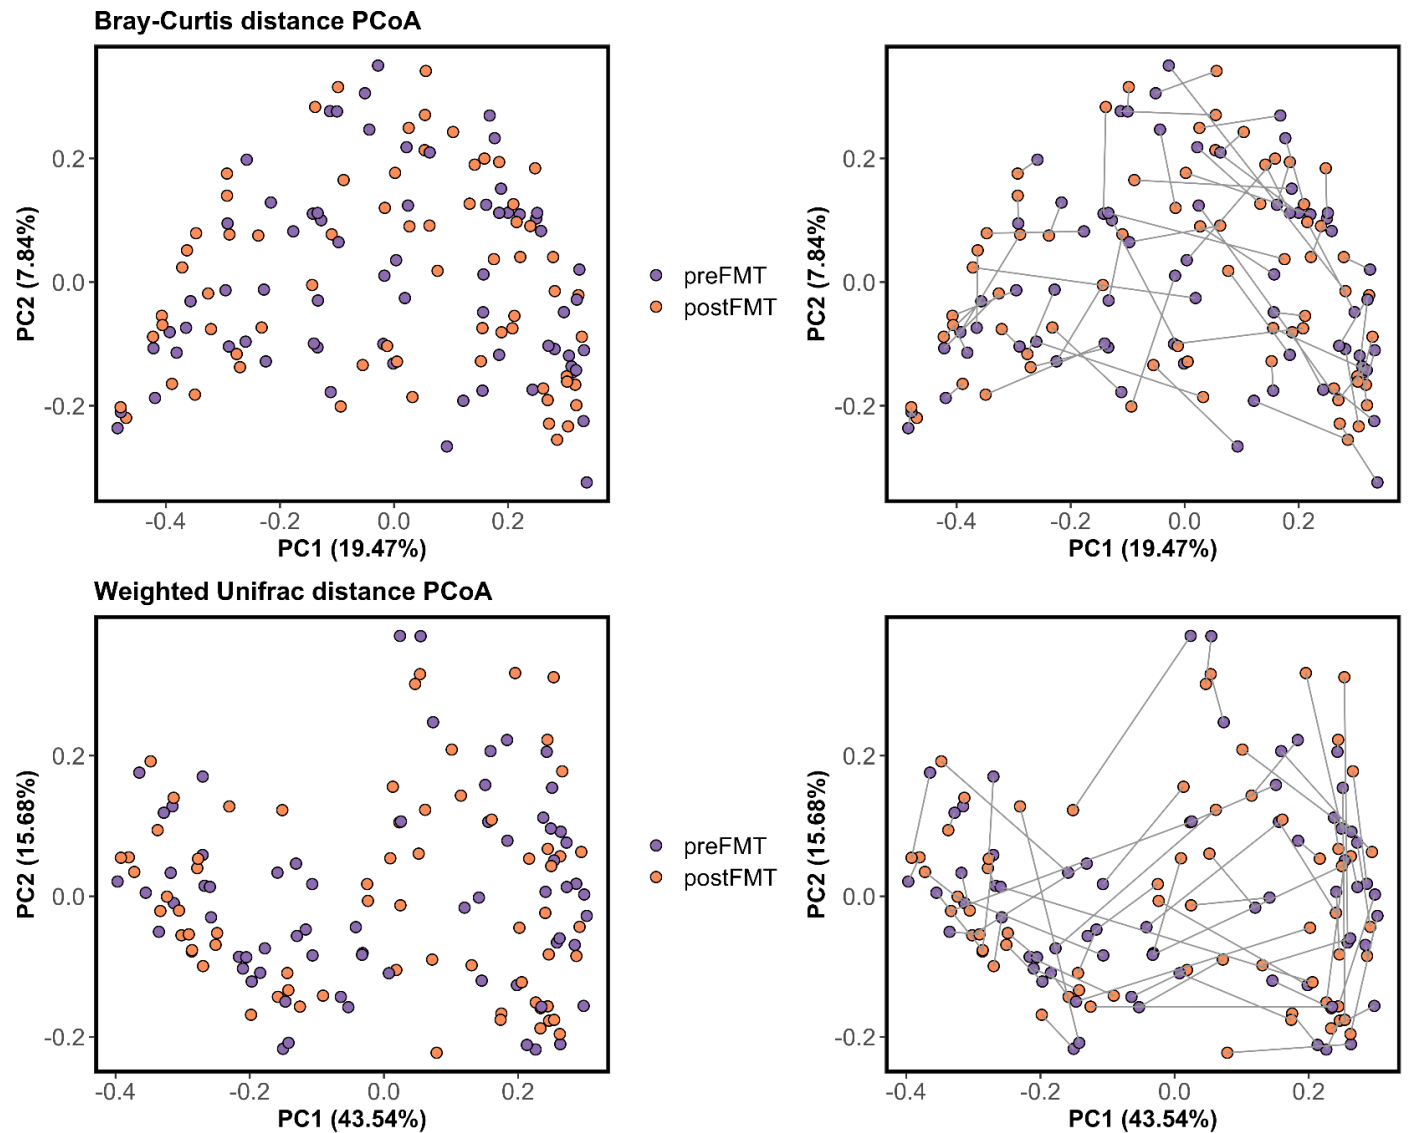

**Fig S3. Posthoc testing of bacterial genera that were found to significantly correlate with host predictors according to a linear model.** A-D) Posthoc testing of bacterial relative abundances ~ clinical symptoms, E-G) Posthoc testing of bacterial relative abundances ~ IBD diagnosis, and H-I) Posthoc testing of bacterial relative abundances ~ Diet category. Tukey contrasts were used.

**A) GLM  $\Delta$  Relative Abundance of *Blautia* ~ Clinical symptoms**

| Linear Hypotheses:                                            |          |            |         |          |
|---------------------------------------------------------------|----------|------------|---------|----------|
|                                                               | Estimate | Std. Error | z value | Pr(> z ) |
| Constipation - Diarrhea == 0                                  | 1.183    | 2.081      | 0.569   | 0.9402   |
| VomDiarr - Diarrhea == 0                                      | -3.956   | 1.573      | -2.514  | 0.0562 . |
| Other - Diarrhea == 0                                         | -2.095   | 1.980      | -1.058  | 0.7106   |
| VomDiarr - Constipation == 0                                  | -5.139   | 2.132      | -2.411  | 0.0735 . |
| Other - Constipation == 0                                     | -3.278   | 2.338      | -1.402  | 0.4922   |
| Other - VomDiarr == 0                                         | 1.861    | 2.183      | 0.853   | 0.8260   |
| ---                                                           |          |            |         |          |
| Signif. codes: 0 '***' 0.001 '**' 0.01 '*' 0.05 '.' 0.1 ' ' 1 |          |            |         |          |
| (Adjusted p values reported -- single-step method)            |          |            |         |          |

**B) GLM  $\Delta$  Relative Abundance of *Collinsella* ~ Clinical symptoms**

| Linear Hypotheses:                                            |          |            |         |            |
|---------------------------------------------------------------|----------|------------|---------|------------|
|                                                               | Estimate | Std. Error | z value | Pr(> z )   |
| Constipation - Diarrhea == 0                                  | 5.0508   | 2.6913     | 1.877   | 0.23370    |
| VomDiarr - Diarrhea == 0                                      | -4.6263  | 2.0341     | -2.274  | 0.10157    |
| Other - Diarrhea == 0                                         | 0.3183   | 2.5603     | 0.124   | 0.99930    |
| VomDiarr - Constipation == 0                                  | -9.6771  | 2.7567     | -3.510  | 0.00227 ** |
| Other - Constipation == 0                                     | -4.7325  | 3.0230     | -1.565  | 0.39285    |
| Other - VomDiarr == 0                                         | 4.9446   | 2.8221     | 1.752   | 0.29172    |
| ---                                                           |          |            |         |            |
| Signif. codes: 0 '***' 0.001 '**' 0.01 '*' 0.05 '.' 0.1 ' ' 1 |          |            |         |            |
| (Adjusted p values reported -- single-step method)            |          |            |         |            |

**C) GLM  $\Delta$  Relative Abundance of *Negativibacillus* ~ Clinical symptoms**

| Linear Hypotheses:                                            |          |            |         |          |
|---------------------------------------------------------------|----------|------------|---------|----------|
|                                                               | Estimate | Std. Error | z value | Pr(> z ) |
| Constipation - Diarrhea == 0                                  | 0.0032   | 0.7221     | 0.004   | 1.0000   |
| VomDiarr - Diarrhea == 0                                      | -0.3696  | 0.5458     | -0.677  | 0.9039   |
| Other - Diarrhea == 0                                         | 1.7741   | 0.6870     | 2.583   | 0.0474 * |
| VomDiarr - Constipation == 0                                  | -0.3728  | 0.7397     | -0.504  | 0.9572   |
| Other - Constipation == 0                                     | 1.7709   | 0.8111     | 2.183   | 0.1250   |
| Other - VomDiarr == 0                                         | 2.1437   | 0.7572     | 2.831   | 0.0236 * |
| ---                                                           |          |            |         |          |
| Signif. codes: 0 '***' 0.001 '**' 0.01 '*' 0.05 '.' 0.1 ' ' 1 |          |            |         |          |
| (Adjusted p values reported -- single-step method)            |          |            |         |          |

#### D) GLM $\Delta$ Relative Abundance of Desulfovibrio ~ Clinical symptoms

```
Linear Hypotheses:
              Estimate Std. Error z value Pr(>|z|)
Constipation - Diarrhea == 0  0.199837  0.393251  0.508  0.9562
VomDiarr - Diarrhea == 0    -0.002596  0.297223 -0.009  1.0000
Other - Diarrhea == 0       1.006512  0.374116  2.690  0.0350 *
VomDiarr - Constipation == 0 -0.202433  0.402808 -0.503  0.9576
Other - Constipation == 0    0.806675  0.441722  1.826  0.2560
Other - VomDiarr == 0       1.009108  0.412362  2.447  0.0671 .
---
Signif. codes:  0 '***' 0.001 '**' 0.01 '*' 0.05 '.' 0.1 ' ' 1
(Adjusted p values reported -- single-step method)
```

#### E) GLM $\Delta$ Relative Abundance of Parabacteroides ~ IBD

```
Linear Hypotheses:
              Estimate Std. Error z value Pr(>|z|)
No - Yes == 0    -1.25593  0.53756 -2.336  0.0506 .
Maybe - Yes == 0 -1.30207  0.63749 -2.043  0.1012
Maybe - No == 0  -0.04615  0.66580 -0.069  0.9973
---
Signif. codes:  0 '***' 0.001 '**' 0.01 '*' 0.05 '.' 0.1 ' ' 1
(Adjusted p values reported -- single-step method)
```

#### F) GLM $\Delta$ Relative Abundance of Peptoclostridium ~ IBD

```
Linear Hypotheses:
              Estimate Std. Error z value Pr(>|z|)
No - Yes == 0       4.056  1.939  2.092  0.0907 .
Maybe - Yes == 0    5.442  2.300  2.366  0.0466 *
Maybe - No == 0     1.385  2.402  0.577  0.8315
---
Signif. codes:  0 '***' 0.001 '**' 0.01 '*' 0.05 '.' 0.1 ' ' 1
(Adjusted p values reported -- single-step method)
```

#### G) GLM $\Delta$ Relative Abundance of Helicobacter ~ IBD

```
Linear Hypotheses:
              Estimate Std. Error z value Pr(>|z|)
No - Yes == 0    -0.06153  0.30492 -0.202  0.9777
Maybe - Yes == 0  0.87139  0.36160  2.410  0.0418 *
Maybe - No == 0   0.93292  0.37766  2.470  0.0357 *
---
Signif. codes:  0 '***' 0.001 '**' 0.01 '*' 0.05 '.' 0.1 ' ' 1
(Adjusted p values reported -- single-step method)
```

#### H) GLM $\Delta$ Relative Abundance of *Lachnoclostridium* ~ Diet

| Linear Hypotheses:                                            |          |            |         |          |
|---------------------------------------------------------------|----------|------------|---------|----------|
|                                                               | Estimate | Std. Error | z value | Pr(> z ) |
| Wet - Dry == 0                                                | -0.77228 | 1.02817    | -0.751  | 0.975    |
| Raw - Dry == 0                                                | 0.22060  | 0.96015    | 0.230   | 1.000    |
| Wet.Dry - Dry == 0                                            | -0.99521 | 0.87329    | -1.140  | 0.862    |
| Wet.Raw - Dry == 0                                            | -0.01764 | 1.02012    | -0.017  | 1.000    |
| Other - Dry == 0                                              | 1.39623  | 1.00737    | 1.386   | 0.731    |
| Raw - Wet == 0                                                | 0.99288  | 0.84393    | 1.176   | 0.845    |
| Wet.Dry - Wet == 0                                            | -0.22293 | 0.80415    | -0.277  | 1.000    |
| Wet.Raw - Wet == 0                                            | 0.75464  | 0.90425    | 0.835   | 0.960    |
| Other - Wet == 0                                              | 2.16851  | 0.92585    | 2.342   | 0.174    |
| Wet.Dry - Raw == 0                                            | -1.21581 | 0.70543    | -1.723  | 0.510    |
| Wet.Raw - Raw == 0                                            | -0.23824 | 0.79584    | -0.299  | 1.000    |
| Other - Raw == 0                                              | 1.17563  | 0.82951    | 1.417   | 0.712    |
| Wet.Raw - Wet.Dry == 0                                        | 0.97757  | 0.83278    | 1.174   | 0.846    |
| Other - Wet.Dry == 0                                          | 2.39144  | 0.79558    | 3.006   | 0.031 *  |
| Other - Wet.Raw == 0                                          | 1.41387  | 0.92409    | 1.530   | 0.639    |
| ---                                                           |          |            |         |          |
| Signif. codes: 0 '***' 0.001 '**' 0.01 '*' 0.05 '.' 0.1 ' ' 1 |          |            |         |          |
| (Adjusted p values reported -- single-step method)            |          |            |         |          |

#### I) GLM $\Delta$ Relative Abundance of *Veillonella* ~ Diet

| Linear Hypotheses:                                            |          |            |         |          |
|---------------------------------------------------------------|----------|------------|---------|----------|
|                                                               | Estimate | Std. Error | z value | Pr(> z ) |
| Wet - Dry == 0                                                | -4.33467 | 1.38793    | -3.123  | 0.0216 * |
| Raw - Dry == 0                                                | -3.82097 | 1.29611    | -2.948  | 0.0368 * |
| Wet.Dry - Dry == 0                                            | -3.76094 | 1.17886    | -3.190  | 0.0173 * |
| Wet.Raw - Dry == 0                                            | -4.18418 | 1.37707    | -3.038  | 0.0280 * |
| Other - Dry == 0                                              | -4.01329 | 1.35984    | -2.951  | 0.0364 * |
| Raw - Wet == 0                                                | 0.51370  | 1.13922    | 0.451   | 0.9976   |
| Wet.Dry - Wet == 0                                            | 0.57373  | 1.08552    | 0.529   | 0.9949   |
| Wet.Raw - Wet == 0                                            | 0.15049  | 1.22065    | 0.123   | 1.0000   |
| Other - Wet == 0                                              | 0.32138  | 1.24981    | 0.257   | 0.9998   |
| Wet.Dry - Raw == 0                                            | 0.06003  | 0.95226    | 0.063   | 1.0000   |
| Wet.Raw - Raw == 0                                            | -0.36321 | 1.07431    | -0.338  | 0.9994   |
| Other - Raw == 0                                              | -0.19233 | 1.11976    | -0.172  | 1.0000   |
| Wet.Raw - Wet.Dry == 0                                        | -0.42324 | 1.12416    | -0.376  | 0.9990   |
| Other - Wet.Dry == 0                                          | -0.25235 | 1.07395    | -0.235  | 0.9999   |
| Other - Wet.Raw == 0                                          | 0.17089  | 1.24743    | 0.137   | 1.0000   |
| ---                                                           |          |            |         |          |
| Signif. codes: 0 '***' 0.001 '**' 0.01 '*' 0.05 '.' 0.1 ' ' 1 |          |            |         |          |
| (Adjusted p values reported -- single-step method)            |          |            |         |          |
