# Supplementary material for: Microbiome Responses to Fecal Microbiota Transplantation in Cats with Chronic Digestive Issues
Source: Preprints.org preprint supplement (doi:10.20944/preprints202301.0168.v1), 2023-01-10
Supplement: Supplementary file 3 [file supplementary]

Archive with 6 entries (6 files):
- Supplementary_Tables.xlsx
- __MACOSX/._Supplementary_Tables.xlsx
- Supplementary_Figures.pdf
- __MACOSX/._Supplementary_Figures.pdf
- Rojas_FMTCats_manuscript.docx
- __MACOSX/._Rojas_FMTCats_manuscript.docx
